# Supplementary material
Source: PubMed Central journal article supplement (PMC6680113)
Supplement: CPT-105-1187-s001.pdf [file CPT-105-1187-s001.pdf]

# Figure S1: Clinical Study Subject Disposition

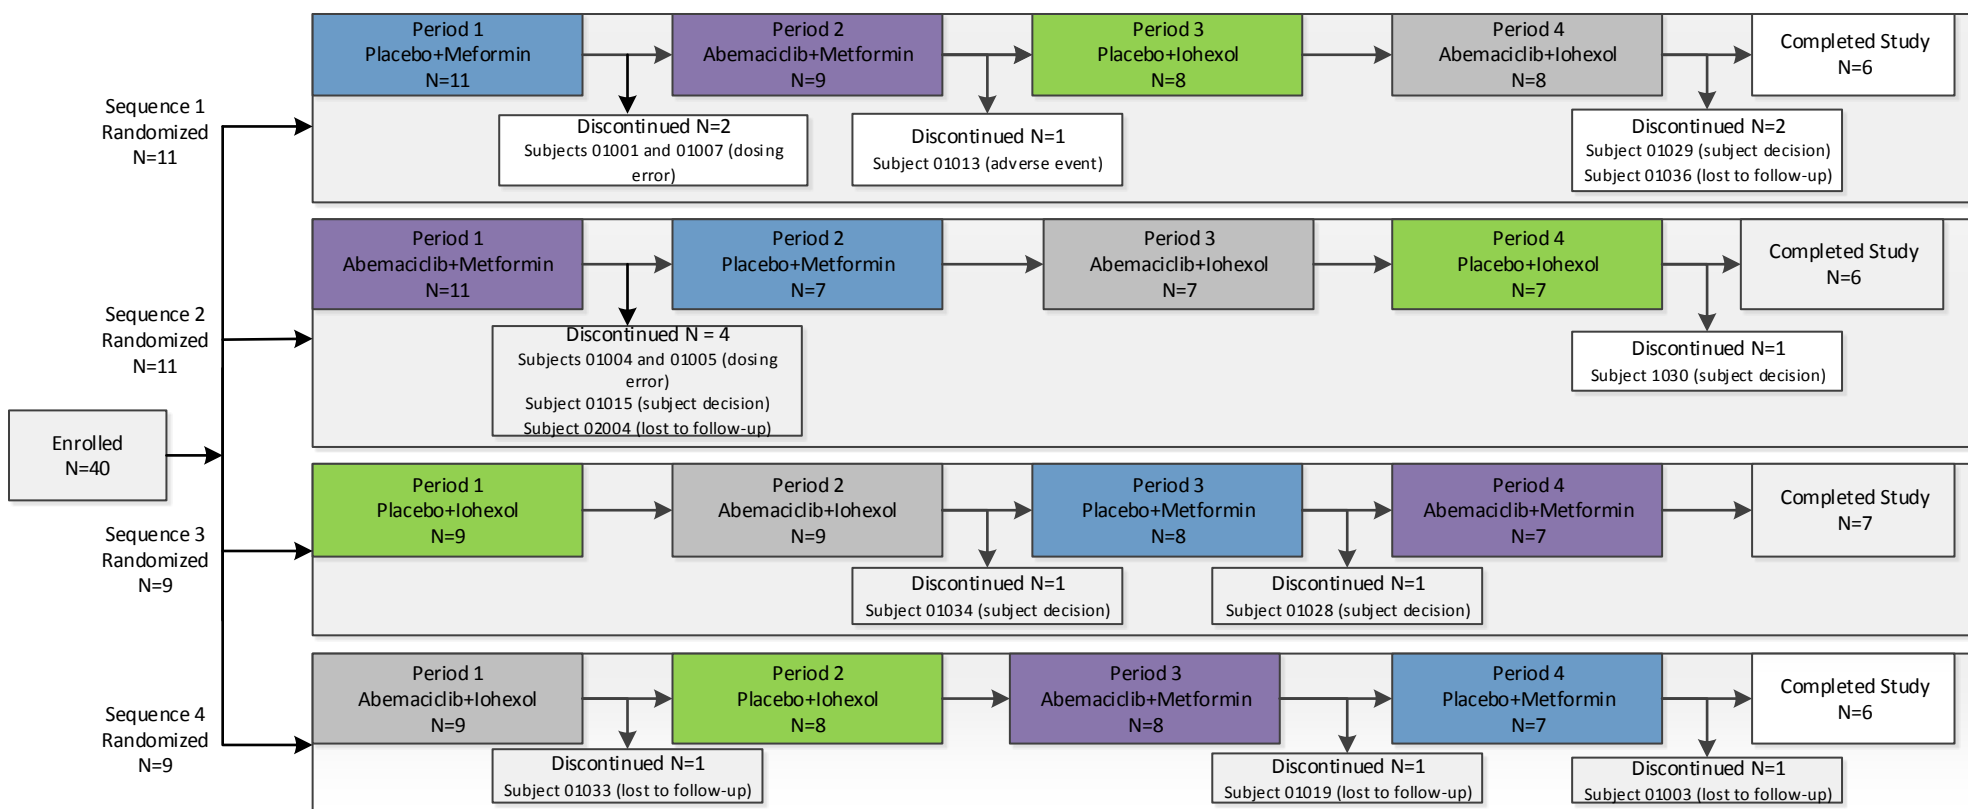

|                                                      | Placebo+Metformin   | Abemaciclib+Metformin | Placebo+Iohexol | Abemaciclib+Iohexol |
|------------------------------------------------------|---------------------|-----------------------|-----------------|---------------------|
| Subjects with evaluable safety data (subjects dosed) | N = 33 <sup>a</sup> | N = 35 <sup>b</sup>   | N = 32          | N = 33              |
| Subjects with evaluable PK data (including emesis)   | N = 30 <sup>c</sup> | N = 32 <sup>d</sup>   | N = 32          | N = 33              |
| Subjects with evaluable PK data (excluding emesis)   | N = 30              | N = 28 <sup>e</sup>   | N = 32          | N = 30 <sup>f</sup> |

Abbreviations: PK = pharmacokinetic; N = number of subjects

<sup>a</sup>. Includes Subjects 01001 and 01007 (dosing error – received metformin only)

<sup>b</sup>. Includes Subject 01004 and 01005 (dosing error – received metformin only)

<sup>c</sup>. Excludes Subjects 01001, 01007 (dosing error), and 01010 (large sampling time deviations)

<sup>d</sup>. Excludes Subjects 01004, 01005 (dosing error), and 01031 (anomalous PK profile)

<sup>e</sup>. Excludes Subjects 01018, 01021, 02001, and 02007 (emesis)

<sup>f</sup>. Excludes Subjects 01021, 02001, and 02007 (emesis)
